# Supplementary material
Source: ML conference proceedings conference paper supplement (https://openreview.net/forum?id=i28zCSsQIc)

Certificate

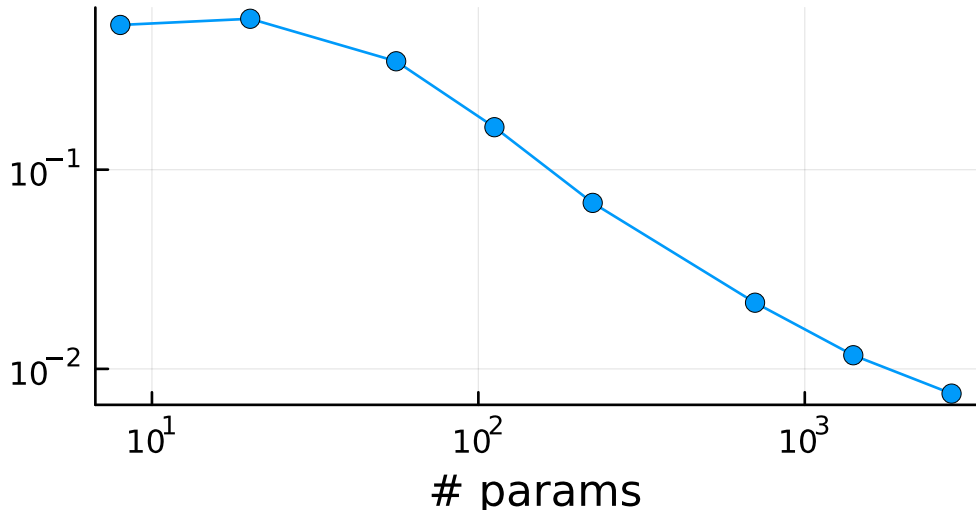

Supplement: supplementary_material [file attachment]

Certificate

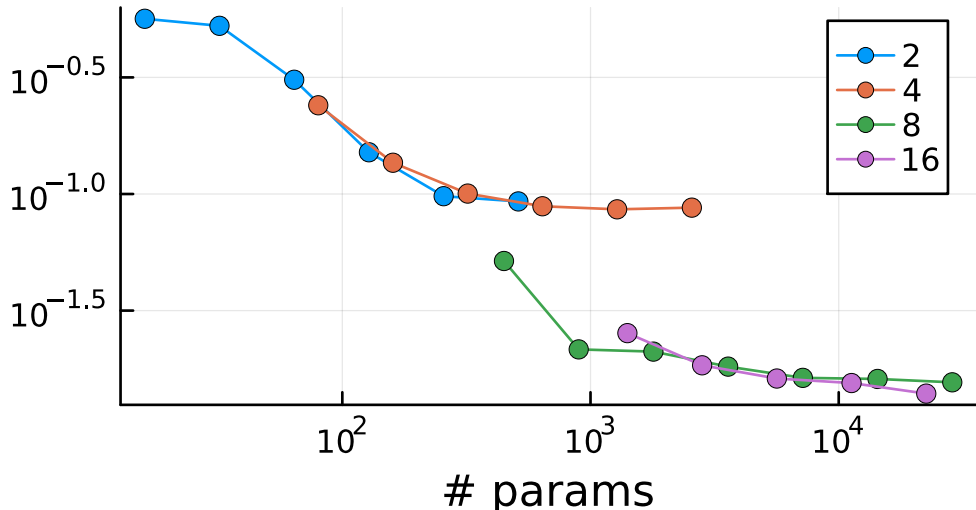

Supplement: supplementary_material [file attachment]

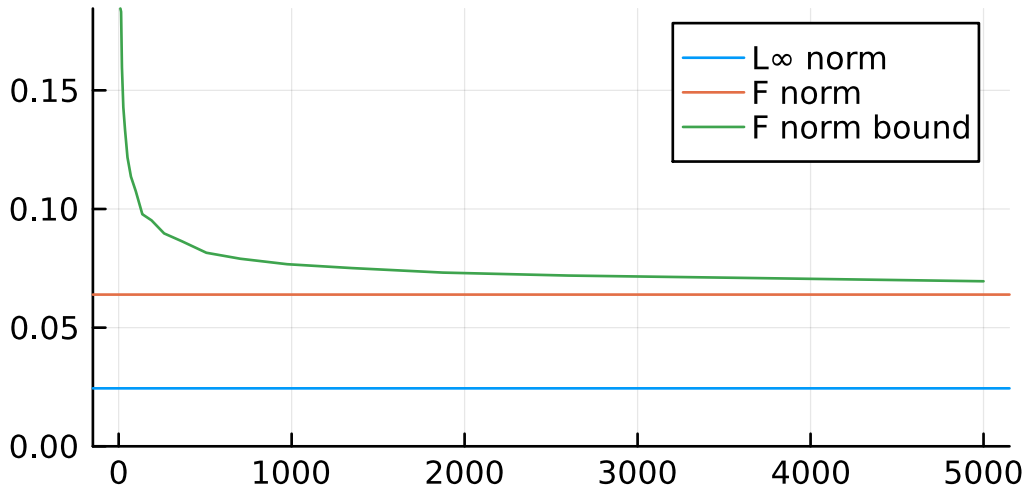

Supplement: supplementary_material [file attachment]

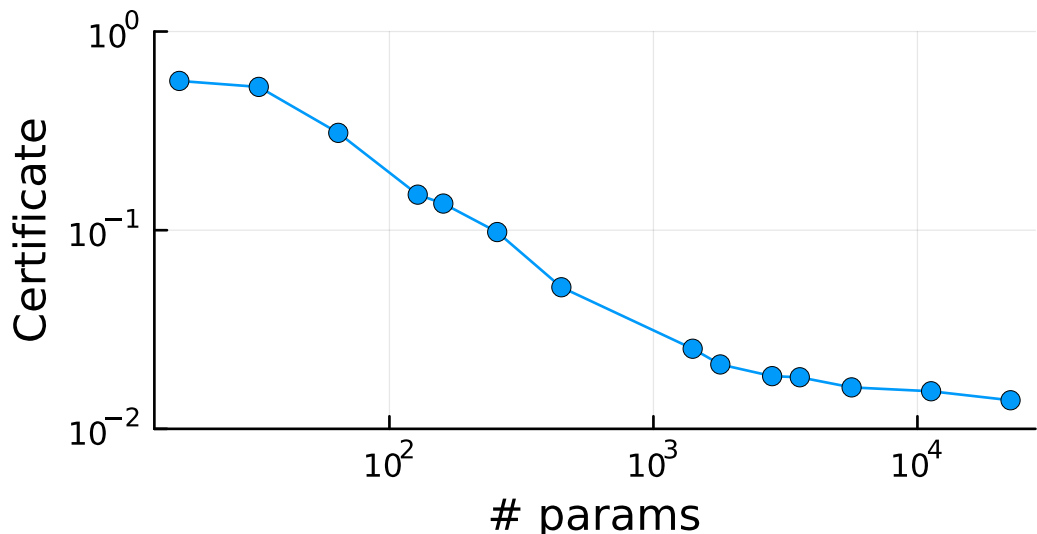

Supplement: supplementary_material [file attachment]

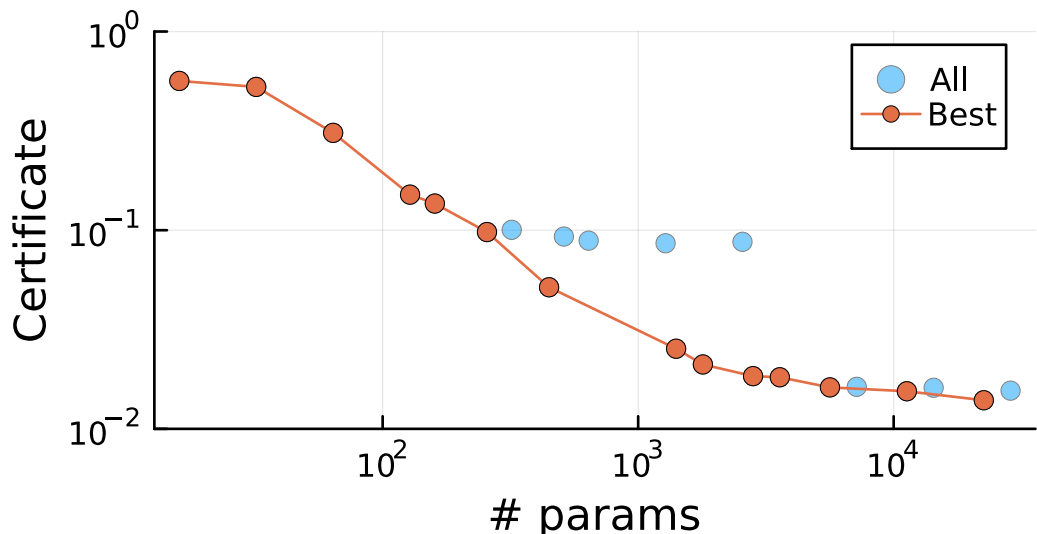

Supplement: supplementary_material [file attachment]

Certificate

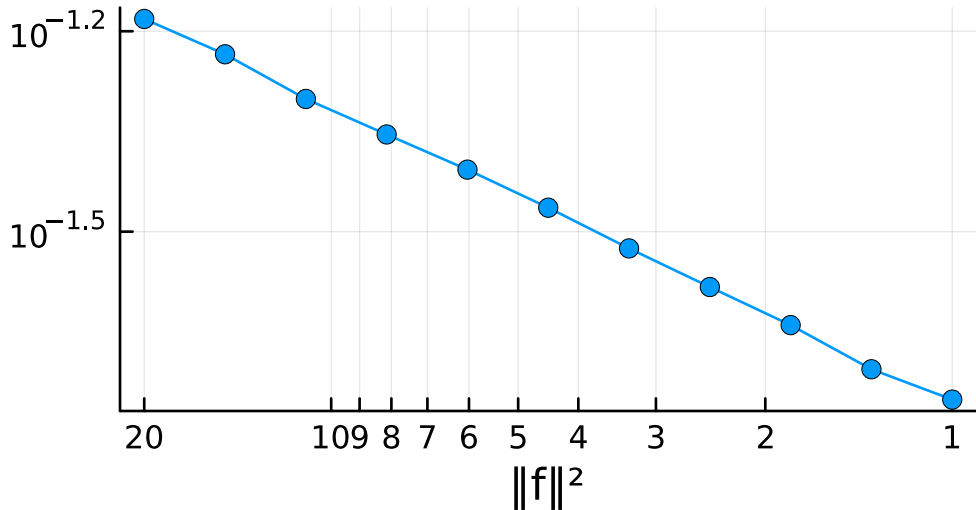

Supplement: supplementary_material [file attachment]
